# Supplementary material for: SPME Method Optimized by Box-Behnken Design for Impact Odorants in Reduced Alcohol Wines
Source: PubMed Central journal article supplement (PMC6112000; doi:10.3390/foods7080127), 2018-08-10
Supplement: foods-07-00127-s001.pdf [file foods-07-00127-s001.pdf]

## 1 Supplementary Material

2 Optimization of SPME conditions for each analyte response was undertaken using a Box-Behnken design of  
3 experiments approach with statistical testing based upon Brereton, 2003. A series of randomized experiments  
4 with extraction conditions set to test each parameter combination in Table 1 was performed. A feature of this  
5 design is the center point for each experimental factor is equidistant to the extremes. Each analyte response at  
6 each set of conditions is then used to determine a predictive response based upon the following equation:

$$7 \hat{y} = b_0 + b_1x_1 + b_2x_2 + b_3x_3 + b_{12}x_1x_2 + b_{13}x_1x_3 + b_{23}x_2x_3 + b_{11}x_1^2 + b_{22}x_2^2 + b_{33}x_3^2$$

9 where

10  $\hat{y}$  = predicted response

11  $b_0$  = intercept or average response

12  $b_1x_1 + b_2x_2 + b_3x_3$  = linear terms associated with each factor (temp, time, sample vol.)

13  $b_{12}x_1x_2 + b_{13}x_1x_3 + b_{23}x_2x_3$  = second order interaction terms between each factor

14  $b_{11}x_1^2 + b_{22}x_2^2 + b_{33}x_3^2$  = quadratic terms for each factor

15  $x_1$  = factor extraction temperature

16  $x_2$  = factor extraction time

17  $x_3$  = factor sample volume in 20 mL vial

18

19 The relationship between an analyte response, the  $b$  coefficients and the experimental conditions can be  
20 expressed in a matrix form as:

$$21 \hat{y} = D.b$$

22 where  $D$  = the design matrix

23

24 A design matrix for the optimization experiment can be constructed from the experimental conditions.

25

26 **Table S1.** Design Matrix for SPME Optimization with central conditions replicated.

27

|           | Linear Terms |       |        | Second Order Interactions |            |            | Quadratic Terms |             |           |
|-----------|--------------|-------|--------|---------------------------|------------|------------|-----------------|-------------|-----------|
| $b_0$     | $b_1$        | $b_2$ | $b_3$  | $b_{12}$                  | $b_{13}$   | $b_{23}$   | $b_{11}$        | $b_{22}$    | $b_{33}$  |
| Intercept | Temperature  | Time  | Volume | Temp x Time               | Temp x Vol | Time x Vol | Temp x Temp     | Time x Time | Vol x Vol |
| 1         | 30           | 15    | 7      | 450                       | 210        | 105        | 900             | 225         | 49        |
| 1         | 30           | 15    | 13     | 450                       | 390        | 195        | 900             | 225         | 169       |
| 1         | 30           | 30    | 10     | 900                       | 300        | 300        | 900             | 900         | 100       |
| 1         | 30           | 45    | 7      | 1350                      | 210        | 315        | 900             | 2025        | 49        |
| 1         | 30           | 45    | 13     | 1350                      | 390        | 585        | 900             | 2025        | 169       |
| 1         | 50           | 15    | 10     | 750                       | 500        | 150        | 2500            | 225         | 100       |
| 1         | 50           | 30    | 7      | 1500                      | 350        | 210        | 2500            | 900         | 49        |
| 1         | 50           | 30    | 10     | 1500                      | 500        | 300        | 2500            | 900         | 100       |
| 1         | 50           | 30    | 13     | 1500                      | 650        | 390        | 2500            | 900         | 169       |
| 1         | 50           | 45    | 10     | 2250                      | 500        | 450        | 2500            | 2025        | 100       |
| 1         | 70           | 15    | 13     | 1050                      | 910        | 195        | 4900            | 225         | 169       |
| 1         | 70           | 30    | 10     | 2100                      | 700        | 300        | 4900            | 900         | 100       |
| 1         | 70           | 45    | 7      | 3150                      | 490        | 315        | 4900            | 2025        | 49        |
| 1         | 70           | 45    | 13     | 3150                      | 910        | 585        | 4900            | 2025        | 169       |
| 1         | 70           | 15    | 7      | 1050                      | 490        | 105        | 4900            | 225         | 49        |

28

29 To facilitate interpretation of the significance of each b coefficient it is helpful to code the design matrix such that  
 30 each experimental factor is on a comparable or common scale. Typically, this is achieved by replacing each  
 31 experimental factor level with  $-1$ ,  $0$  or  $1$  in the design matrix.

32

33 A suitable design matrix for the optimization experiment can be constructed from the experimental conditions.

34

35 **Table S2.** Design Matrix for SPME Optimization with central conditions replicated with experimental factor  
 36 levels coded by -1, 0 or 1.

|            | Linear Terms |            |            | Second Order Interactions |             |             | Quadratic Terms |             |             |
|------------|--------------|------------|------------|---------------------------|-------------|-------------|-----------------|-------------|-------------|
| <i>b</i> 0 | <i>b</i> 1   | <i>b</i> 2 | <i>b</i> 3 | <i>b</i> 12               | <i>b</i> 13 | <i>b</i> 23 | <i>b</i> 11     | <i>b</i> 22 | <i>b</i> 33 |
| Intercept  | Temperature  | Time       | Volume     | Temp x Time               | Temp x Vol  | Time x Vol  | Temp x Temp     | Time x Time | Vol x Vol   |
| 1          | -1           | -1         | -1         | 1                         | 1           | 1           | 1               | 1           | 1           |
| 1          | -1           | -1         | 1          | 1                         | -1          | -1          | 1               | 1           | 1           |
| 1          | -1           | 0          | 0          | 0                         | 0           | 0           | 1               | 0           | 0           |
| 1          | -1           | 1          | -1         | -1                        | 1           | -1          | 1               | 1           | 1           |
| 1          | -1           | 1          | 1          | -1                        | -1          | 1           | 1               | 1           | 1           |
| 1          | 0            | -1         | 0          | 0                         | 0           | 0           | 0               | 1           | 0           |
| 1          | 0            | 0          | -1         | 0                         | 0           | 0           | 0               | 0           | 1           |
| 1          | 0            | 0          | 0          | 0                         | 0           | 0           | 0               | 0           | 0           |
| 1          | 0            | 0          | 1          | 0                         | 0           | 0           | 0               | 0           | 1           |
| 1          | 0            | 1          | 0          | 0                         | 0           | 0           | 0               | 1           | 0           |
| 1          | 1            | -1         | 1          | -1                        | 1           | -1          | 1               | 1           | 1           |
| 1          | 1            | 0          | 0          | 0                         | 0           | 0           | 1               | 0           | 0           |
| 1          | 1            | 1          | -1         | 1                         | -1          | -1          | 1               | 1           | 1           |
| 1          | 1            | 1          | 1          | 1                         | 1           | 1           | 1               | 1           | 1           |
| 1          | 1            | -1         | -1         | -1                        | -1          | 1           | 1               | 1           | 1           |

37  
 38 As the design matrix is not square, i.e. a greater number of experiments than parameter values to be determined,  
 39 a pseudoinverse must be used to determine b coefficients:

40 
$$b = (D'.D)^{-1}.D'.y$$

41 Once b coefficients have been calculated for each experimental factor it is possible to predict  $\hat{y}$  and then  
 42 determine the sum of squares from residuals:

43 
$$SS_{red} = \sum (y - \hat{y})^2$$

44 The mean error sum of squares is determined from the sums of squares of the residuals and degrees of freedom  
 45 such:

46 
$$ss_{mean} = SS_{red} / (N - P)$$
 where *N* = total number of experiments and *P* = number of coefficients

47 Variance associated with the b coefficients is derived from the diagonal of the pseudoinverse design matrix:

48 
$$b_{var} = \text{diagonal} (D'.D)^{-1}$$

49 Student's t-test can now be used to determine significance for each b coefficient with comparison to the 2 tailed  
 50 distribution:

51 
$$t_b = b / \sqrt{(ss_{mean} \times b_{var})}$$

Table S3. Optimized SPME conditions for target aroma compounds for the 5% v/v treatment.

| Compound                  | Temperature (°C) | Extraction Time (min) | Sample Volume (mL) | Predicted Response | Relative Peak Size (RPS) | Inverse RPS | Inverse RPS × OPT Temperature | Inverse RPS × OPT Time | Inverse RPS × OPT Volume |
|---------------------------|------------------|-----------------------|--------------------|--------------------|--------------------------|-------------|-------------------------------|------------------------|--------------------------|
| Ethyl butyrate            | 29.9             | 14.8                  | 6.94               | 21645984           | 0.04                     | 25.8        | 771                           | 381                    | 179                      |
| Ethyl-2-methyl butyrate   | 29.6             | 14.8                  | 6.96               | 2306248            | 0.00                     | 242         | 7153                          | 3581                   | 1683                     |
| Ethyl-3-methyl butyrate   | 29.7             | 14.8                  | 6.96               | 4408021            | 0.01                     | 126         | 3763                          | 1874                   | 881                      |
| Isoamyl acetate           | 29.6             | 14.8                  | 6.96               | 172798045          | 0.31                     | 3.23        | 95.5                          | 47.8                   | 22.4                     |
| 3-Methyl-1-butanol        | 33.7             | 14.8                  | 7.01               | 118938289          | 0.21                     | 4.69        | 158                           | 69.4                   | 32.9                     |
| Ethyl hexanoate           | 29.6             | 14.9                  | 13.1               | 256763255          | 0.46                     | 2.17        | 64.2                          | 32.4                   | 28.4                     |
| Ethyl-s-lactate           | 70.4             | 14.9                  | 13.0               | 11427110           | 0.02                     | 48.8        | 3437                          | 729                    | 636                      |
| (z)-3-Hexenol             | 29.9             | 14.8                  | 13.1               | 1703328            | 0.00                     | 327         | 9793                          | 4849                   | 4277                     |
| Methyl octanoate          | 29.4             | 45.2                  | 13.1               | 7125869            | 0.01                     | 78.3        | 2302                          | 3537                   | 1022                     |
| Ethyl octanoate           | 29.7             | 45.2                  | 13.0               | 557715584          | 1.00                     | 1.00        | 29.7                          | 45.2                   | 13.0                     |
| Propanoic acid            | 70.3             | 45.2                  | 10.0               | 8021459            | 0.01                     | 69.5        | 4885                          | 3142                   | 696                      |
| Linalool                  | 34.2             | 45.3                  | 13.1               | 10086563           | 0.02                     | 55.3        | 1891                          | 2506                   | 722                      |
| Methyl decanoate          | 70.4             | 45.3                  | 10.9               | 21853028           | 0.04                     | 25.5        | 1797                          | 1156                   | 277                      |
| Ethyl decanoate           | 55.5             | 45.2                  | 13.1               | 464847557          | 0.83                     | 1.20        | 76.4                          | 54.2                   | 15.7                     |
| Isoamyl octanoate         | 70.4             | 45.2                  | 10.0               | 11602466           | 0.02                     | 48.1        | 1430                          | 2172                   | 481                      |
| 3-(Methylthio)-1-propanol | 70.3             | 45.3                  | 10.6               | 2184884            | 0.00                     | 255         | 17934                         | 11567                  | 2701                     |
| β-Phenyl ethyl acetate    | 59.8             | 45.2                  | 6.99               | 92369223           | 0.17                     | 6.04        | 361                           | 273                    | 42.2                     |
| Ethyl dodecanoate         | 70.3             | 45.2                  | 13.1               | 95472899           | 0.17                     | 5.84        | 410                           | 264                    | 76.5                     |
| Geraniol                  | 55.9             | 45.1                  | 13.0               | 11467404           | 0.02                     | 48.6        | 2717                          | 2192                   | 634                      |
| β-Phenyl ethanol          | 50.7             | 45.2                  | 13.0               | 276062590          | 0.49                     | 2.02        | 102                           | 91.3                   | 26.3                     |
| Octanoic acid             | 61.0             | 45.3                  | 13.1               | 120528062          | 0.22                     | 4.63        | 282                           | 210                    | 60.4                     |
| Decanoic acid             | 70.3             | 45.3                  | 13.0               | 113488948          | 0.20                     | 4.91        | 345                           | 223                    | 64.0                     |
| Vanillin                  | 70.3             | 45.3                  | 7.21               | 509975             | 0.00                     | 1093        | 76833                         | 49558                  | 7884                     |
| Sum                       |                  |                       |                    |                    |                          | 2480        | 136632                        | 88554                  | 22457                    |
| Weighted mean             |                  |                       |                    |                    |                          |             | 55.1                          | 35.7                   | 9.05                     |

**Table S4.** Optimized SPME conditions for target aroma compounds for the 8% v/v treatment.

| Compound                  | Temperature (°C) | Extraction Time (min) | Sample Volume (mL) | Predicted Response | Relative Peak Size (RPS) | Inverse RPS | Inverse RPS × OPT Temperature | Inverse RPS × OPT Time | Inverse RPS × OPT Volume |
|---------------------------|------------------|-----------------------|--------------------|--------------------|--------------------------|-------------|-------------------------------|------------------------|--------------------------|
| Ethyl butyrate            | 29.9             | 14.8                  | 6.94               | 16238803           | 0.03                     | 29.1        | 871                           | 431                    | 202                      |
| Ethyl-2-methyl butyrate   | 29.6             | 14.8                  | 6.96               | 1831724            | 0.00                     | 258         | 764                           | 3825                   | 1798                     |
| Ethyl-3-methyl butyrate   | 29.7             | 14.8                  | 6.96               | 3521895            | 0.01                     | 134         | 3996                          | 1990                   | 935                      |
| Isoamyl acetate           | 29.6             | 14.8                  | 6.96               | 138864602          | 0.29                     | 3.41        | 101                           | 50.5                   | 23.7                     |
| 3-Methyl-1-butanol        | 33.7             | 14.8                  | 7.01               | 105083519          | 0.22                     | 4.50        | 152                           | 66.7                   | 31.6                     |
| Ethyl hexanoate           | 29.6             | 14.9                  | 13.1               | 212711796          | 0.45                     | 2.22        | 65.8                          | 33.2                   | 29.1                     |
| Ethyl-s-lactate           | 70.4             | 45.2                  | 13.0               | 10546032           | 0.02                     | 44.9        | 3160                          | 2028                   | 585                      |
| (z)-3-Hexenol             | 29.9             | 45.3                  | 13.1               | 1288470            | 0.00                     | 368         | 10985                         | 16643                  | 4798                     |
| Methyl octanoate          | 29.4             | 45.2                  | 13.1               | 5904502            | 0.01                     | 80.1        | 2357                          | 3622                   | 1047                     |
| Ethyl octanoate           | 29.7             | 45.2                  | 13.0               | 473208764          | 1.00                     | 1.00        | 29.7                          | 45.2                   | 13.0                     |
| Propanoic acid            | 70.3             | 45.2                  | 8.85               | 7181436            | 0.01                     | 65.9        | 4629                          | 2978                   | 583                      |
| Linalool                  | 34.2             | 45.3                  | 13.1               | 8397224            | 0.02                     | 56.3        | 1928                          | 2554                   | 736                      |
| Methyl decanoate          | 70.4             | 14.6                  | 12.8               | 16907471           | 0.04                     | 28.0        | 1971                          | 407                    | 358                      |
| Ethyl decanoate           | 55.5             | 45.2                  | 13.1               | 384592070          | 0.81                     | 1.23        | 68.3                          | 55.6                   | 16.1                     |
| Isoamyl octanoate         | 70.4             | 45.2                  | 10.4               | 9153205            | 0.02                     | 51.7        | 3641                          | 2336                   | 539                      |
| 3-(Methylthio)-1-propanol | 70.3             | 45.3                  | 10.6               | 1854344            | 0.00                     | 255         | 17928                         | 11564                  | 2701                     |
| β-Phenyl ethyl acetate    | 59.8             | 45.2                  | 6.99               | 70705745           | 0.15                     | 6.69        | 400                           | 302                    | 46.8                     |
| Ethyl dodecanoate         | 70.3             | 45.2                  | 13.1               | 85079298           | 0.18                     | 5.56        | 391                           | 251                    | 72.8                     |
| Geraniol                  | 53.9             | 45.1                  | 13.0               | 9499880            | 0.02                     | 49.8        | 2684                          | 2245                   | 650                      |
| β-Phenyl ethanol          | 50.7             | 45.2                  | 13.0               | 240643663          | 0.51                     | 1.97        | 100.0                         | 88.9                   | 25.6                     |
| Octanoic acid             | 58.2             | 45.3                  | 13.1               | 98862998           | 0.21                     | 4.79        | 278                           | 217                    | 62.5                     |
| Decanoic acid             | 70.3             | 45.3                  | 13.0               | 96606109           | 0.20                     | 4.90        | 344                           | 222                    | 63.7                     |
| Vanillin                  | 70.3             | 45.3                  | 6.94               | 563633             | 0.00                     | 840         | 58985                         | 38046                  | 5824                     |
| Sum                       |                  |                       |                    |                    |                          | 2297        | 122706                        | 90002                  | 21141                    |
| Weighted mean             |                  |                       |                    |                    |                          |             | 53.4                          | 39.1                   | 9.20                     |

**Table S5.** Optimized SPME conditions for target aroma compounds for the 13% v/v treatment.

| Compound                  | Temperature (°C) | Extraction Time (min) | Sample Volume (mL) | Predicted Response | Relative Peak Size (RPS) | Inverse RPS | Inverse RPS × OPT Temperature | Inverse RPS × OPT Time | Inverse RPS × OPT Volume |
|---------------------------|------------------|-----------------------|--------------------|--------------------|--------------------------|-------------|-------------------------------|------------------------|--------------------------|
| Ethyl butyrate            | 29.9             | 14.8                  | 6.94               | 13701954           | 0.03                     | 33.1        | 937                           | 464                    | 217                      |
| Ethyl-2-methyl butyrate   | 29.6             | 14.8                  | 6.96               | 2589960            | 0.01                     | 285         | 4900                          | 2453                   | 1153                     |
| Ethyl-3-methyl butyrate   | 29.7             | 14.8                  | 6.96               | 3072342            | 0.01                     | 146         | 4154                          | 2068                   | 972                      |
| Isoamyl acetate           | 29.6             | 14.8                  | 6.96               | 123238386          | 0.29                     | 3.46        | 103                           | 51.6                   | 24.2                     |
| 3-Methyl-1-butanol        | 30.4             | 14.8                  | 7.01               | 96504230           | 0.22                     | 4.46        | 150                           | 65.8                   | 31.2                     |
| Ethyl hexanoate           | 29.6             | 14.9                  | 13.1               | 189437593          | 0.44                     | 2.33        | 67.0                          | 33.8                   | 29.6                     |
| Ethyl-s-lactate           | 70.4             | 45.2                  | 13.0               | 10037916           | 0.02                     | 41.8        | 3010                          | 1932                   | 557                      |
| (z)-3-Hexenol             | 29.9             | 45.3                  | 13.1               | 1122492            | 0.00                     | 372         | 11433                         | 17322                  | 4993                     |
| Methyl octanoate          | 29.4             | 45.2                  | 13.1               | 5284504            | 0.01                     | 82.0        | 2388                          | 3669                   | 1061                     |
| Ethyl octanoate           | 29.7             | 45.2                  | 13.0               | 429071690          | 1.00                     | 1.00        | 29.7                          | 45.2                   | 13.0                     |
| Propanoic acid            | 70.3             | 45.2                  | 7.98               | 7102412            | 0.02                     | 49.7        | 4244                          | 2730                   | 534                      |
| Linalool                  | 31.1             | 45.3                  | 13.1               | 7676236            | 0.02                     | 53.3        | 1736                          | 2533                   | 730                      |
| Methyl decanoate          | 70.4             | 14.6                  | 12.8               | 16153172           | 0.04                     | 21.1        | 1872                          | 387                    | 340                      |
| Ethyl decanoate           | 43.6             | 45.2                  | 13.1               | 351186957          | 0.82                     | 1.15        | 62.0                          | 55.2                   | 16.0                     |
| Isoamyl octanoate         | 70.4             | 14.9                  | 10.0               | 8463703            | 0.02                     | 42.9        | 3570                          | 2291                   | 529                      |
| 3-(Methylthio)-1-propanol | 70.3             | 45.3                  | 9.71               | 1761832            | 0.00                     | 212         | 17110                         | 11036                  | 2366                     |
| β- Phenyl ethyl acetate   | 59.8             | 45.2                  | 6.99               | 60423655           | 0.14                     | 7.44        | 425                           | 321                    | 49.6                     |
| Ethyl dodecanoate         | 70.3             | 45.2                  | 13.1               | 78999059           | 0.18                     | 5.36        | 382                           | 245                    | 71.1                     |
| Geraniol                  | 52.9             | 45.1                  | 13.0               | 8248338            | 0.02                     | 59.2        | 2803                          | 2344                   | 678                      |
| β-Phenyl ethanol          | 48.4             | 45.2                  | 13.0               | 223882098          | 0.52                     | 1.82        | 95.3                          | 86.6                   | 25.0                     |
| Octanoic acid             | 52.9             | 45.3                  | 13.1               | 87838265           | 0.20                     | 4.99        | 274                           | 221                    | 63.8                     |
| Decanoic acid             | 70.3             | 45.3                  | 13.0               | 82814114           | 0.19                     | 6.54        | 364                           | 235                    | 67.4                     |
| Vanillin                  | 70.3             | 45.3                  | 7.21               | 585904             | 0.00                     | 636         | 51450                         | 33186                  | 5080                     |
| Sum                       |                  |                       |                    |                    |                          | 2073        | 111558                        | 83776                  | 19603                    |
| Weighted mean             |                  |                       |                    |                    |                          |             | 53.8                          | 40.4                   | 9.45                     |

55 **Table S6.** Target compounds identification and calibration parameters for three different levels of ethanol content of wine.

| Compound                | IS   | SIM group | Retention time (minutes) | Target ion (m/z) | Qualifier ion (m/z)% | Ethanol (% v/v) | Calibration range (µg/L) | Calibration Equation | r <sup>2</sup> | SN ratio at LOQ | RI   | Boiling Point (°C) <sup>e</sup> |                      |
|-------------------------|------|-----------|--------------------------|------------------|----------------------|-----------------|--------------------------|----------------------|----------------|-----------------|------|---------------------------------|----------------------|
| Ethyl butyrate          | IS-2 | 1         | 10.23                    | 71               | 43                   | 5               | 0.065-1314               | y=1.673x+0.1434      | 0.999          | 47              | 1045 | 121                             |                      |
|                         |      |           |                          |                  | 88                   | 8               |                          | y=1.905x-0.3106      | 0.992          | 25              |      |                                 | (1048 <sup>a</sup> ) |
|                         |      |           |                          |                  | 29                   | 13              |                          | y=1.879x-0.2368      | 0.996          | 24              |      |                                 |                      |
| Ethyl-2-methyl butyrate | IS-2 | 1         | 10.69                    | 57               | 102                  | 5               | 0.003-66.3               | y=3.708x+0.0161      | 0.998          | 16              | 1061 | 138                             |                      |
|                         |      |           |                          |                  | 85                   | 8               |                          | y=3.676x+0.0123      | 0.992          | 12              |      |                                 | (1049 <sup>b</sup> ) |
|                         |      |           |                          |                  | 29                   | 13              |                          | y=3.946x-0.0204      | 0.998          | 10              |      |                                 |                      |
| Ethyl-3-methyl butyrate | IS-2 | 1         | 11.14                    | 88               | 57                   | 5               |                          | y=30.34x+0.0533      | 0.999          | 10              | 1076 | 134                             |                      |
|                         |      |           |                          |                  | 29                   | 8               |                          | y=31.30x+0.0265      | 0.988          | 16              |      |                                 | (1069 <sup>b</sup> ) |
|                         |      |           |                          |                  | 85                   | 13              |                          | y=33.29x-0.0557      | 0.997          | 13              |      |                                 |                      |
| Isoamyl acetate         | IS-1 | 1         | 12.61                    | 43               | 70                   | 5               | 0.02385-4770             | y=49.16x+6.099       | 0.988          | 17              | 1128 | 130                             |                      |
|                         |      |           |                          |                  | 55                   | 8               |                          | y=65.62x-1.962       | 0.993          | 19              |      |                                 | (1115 <sup>a</sup> ) |
|                         |      |           |                          |                  |                      | 13              |                          | y=48.76x+7.174       | 0.967          | 12              |      |                                 |                      |
| 3-methyl-1-butanol      | IS-4 | 2         | 15.429                   | 55               | 70                   | 5               | 24.359-487180            | y=5.546x-1.5090      | 0.998          | 55              | 1230 | 132                             |                      |
|                         |      |           |                          |                  | 41                   | 8               |                          | y=10.79x-4.539       | 0.995          | 49              |      |                                 | (1206 <sup>d</sup> ) |
|                         |      |           |                          |                  | 43                   | 13              |                          | y=9.417x-1.477       | 0.995          | 61              |      |                                 |                      |
| Ethyl hexanoate         | IS-3 | 2         | 15.6                     | 88               | 99                   | 5               | 0.1296-2592              | y=0.4574x+0.6586     | 0.972          | 14              | 1237 | 167                             |                      |
|                         |      |           |                          |                  | 43                   | 8               |                          | y=0.7313x+0.2447     | 0.982          | 12              |      |                                 | (1221 <sup>a</sup> ) |
|                         |      |           |                          |                  | 70                   | 13              |                          | y=0.6915x+0.0808     | 0.998          | 20              |      |                                 |                      |
| Ethyl-s-lactate         | IS-4 | 3         | 18.72                    | 45               | 75                   | 5               | 25-500000                | y=0.4980x-0.5463     | 0.983          | 27              |      | 154                             |                      |
|                         |      |           |                          |                  | 43                   | 8               |                          | y=0.8961x-0.8372     | 0.991          | 14              |      |                                 | 1361                 |

| Compound          | IS   | SIM group | Retention time (minutes) | Target ion (m/z) | Qualifier ion (m/z)% | Ethanol (% v/v) | Calibration range (µg/L) | Calibration Equation | r <sup>2</sup> | SN ratio at LOQ | RI   | Boiling Point (°C) <sup>e</sup> |                      |
|-------------------|------|-----------|--------------------------|------------------|----------------------|-----------------|--------------------------|----------------------|----------------|-----------------|------|---------------------------------|----------------------|
| (z)-3-hexenol     | IS-4 | 3         | 19.708                   | 67               | 29                   | 13              | 0.05325-1065             | y=0.6428x-0.5267     | 0.977          | 26              | 1402 | 156                             |                      |
|                   |      |           |                          |                  | 55                   | 5               |                          | y=0.0326x-0.0538     | 0.993          | 23              |      |                                 |                      |
|                   |      |           |                          |                  | 39                   | 8               |                          | y=0.059x-0.1121      | 0.982          | 17              |      |                                 | (1407 <sup>d</sup> ) |
| Methyl octanoate  | IS-5 | 3         | 19.57                    | 74               | 41                   | 13              | 0.001-2                  | y=0.0421x-0.0475     | 0.984          | 21              | 1397 | 192                             |                      |
|                   |      |           |                          |                  | 87                   | 5               |                          | y=1.7140x+0.0014     | 0.996          | 18              |      |                                 | (1387 <sup>d</sup> ) |
|                   |      |           |                          |                  | 43                   | 8               |                          | y=1.785x-0.0025      | 0.983          | 13              |      |                                 |                      |
| Ethyl octanoate   | IS-5 | 3         | 20.605                   | 88               | 55                   | 13              | 0.041-835                | y=1.956x-0.0009      | 0.998          | 20              | 1442 | 207                             |                      |
|                   |      |           |                          |                  | 101                  | 5               |                          | y=0.5172x+0.1990     | 0.997          | 31              |      |                                 | (1433 <sup>a</sup> ) |
|                   |      |           |                          |                  | 127                  | 8               |                          | y=0.5790x-0.1378     | 0.995          | 19              |      |                                 |                      |
| Propanoic acid    | IS-4 | 4         | 23.11                    | 74               | 60                   | 13              | 5.6945-113890            | y=0.6325x+0.0932     | 0.998          | 20              | 1556 | 141.2                           |                      |
|                   |      |           |                          |                  | 45                   | 5               |                          | y=0.1603x-0.0166     | 0.997          | 18              |      |                                 | (1523 <sup>d</sup> ) |
|                   |      |           |                          |                  | 73                   | 8               |                          | y=2.4790x-0.5021     | 0.986          | 15              |      |                                 |                      |
| Linalool          | IS-4 | 4         | 23.27                    | 71               | 13                   | 13              | 0.015-307                | y=1.674x-0.2852      | 0.982          | 17              | 1564 | 198                             |                      |
|                   |      |           |                          |                  | 93                   | 5               |                          | y=0.6731x-0.1824     | 0.998          | 12              |      |                                 | (1560 <sup>b</sup> ) |
|                   |      |           |                          |                  | 55                   | 8               |                          | y=1.144x-0.4038      | 0.995          | 16              |      |                                 |                      |
| Methyl decanoate  | IS-6 | 4         | 24.117                   | 74               | 41                   | 13              | 0.000498-9.95            | y=0.8213x-0.0324     | 0.996          | 15              | 1604 | 108                             |                      |
|                   |      |           |                          |                  | 87                   | 5               |                          | y=0.6335x+0.0037     | 0.985          | 66              |      |                                 | (1590 <sup>d</sup> ) |
|                   |      |           |                          |                  | 143                  | 8               |                          | y= 1.211x-0.0084     | 0.989          | 19              |      |                                 |                      |
| Ethyl decanoate   | IS-6 | 5         | 25.007                   | 88               | 43                   | 13              | 0.022-441                | y=1.275x-0.0054      | 0.995          | 29              | 1649 | 245                             |                      |
|                   |      |           |                          |                  | 101                  | 5               |                          | y=0.2662x+0.0337     | 0.987          | 21              |      |                                 | (1641 <sup>a</sup> ) |
|                   |      |           |                          |                  | 43                   | 8               |                          | y=0.5430x-0.1734     | 0.995          | 13              |      |                                 |                      |
| Isoamyl octanoate | IS-5 | 5         | 25.54                    | 70               | 13                   | 13              | 0.0001-2.23              | y=0.5400x-0.0071     | 0.991          | 17              | 1676 | 267                             |                      |
|                   |      |           |                          |                  | 127                  | 5               |                          | y=2.4550x-0.0062     | 0.977          | 16              |      |                                 | (1689 <sup>a</sup> ) |
|                   |      |           |                          |                  | 43                   | 8               |                          | y=6.3390x-0.0213     | 0.968          | 13              |      |                                 |                      |



| Compound                  | IS   | SIM group | Retention time (minutes) | Target ion (m/z) | Qualifier ion (m/z)% | Ethanol (% v/v) | Calibration range (µg/L) | Calibration Equation | r <sup>2</sup> | SN ratio at LOQ | RI                   | Boiling Point (°C) <sup>e</sup> |                      |
|---------------------------|------|-----------|--------------------------|------------------|----------------------|-----------------|--------------------------|----------------------|----------------|-----------------|----------------------|---------------------------------|----------------------|
| 3-(methylthio)-1-propanol | IS-4 | 5         | 26.88                    | 106              | 61                   | 5               | 0.542-10857              | y=6.5900x-0.0166     | 0.963          | 22              | 1745                 | 90                              |                      |
|                           |      |           |                          |                  | 73                   | 8               |                          | y=0.0068-0.1821      | 0.982          | 38              |                      |                                 | (1745 <sup>d</sup> ) |
|                           |      |           |                          |                  | 31                   | 13              |                          | y=0.0052-0.1022      | 0.975          | 57              |                      |                                 |                      |
| β-phenyl ethyl acetate    | IS-1 | 6         | 28.75                    | 104              | 91                   | 5               | 0.004-858                | y=369.5x-4.596       | 0.992          | 60              | 1847                 | 229                             |                      |
|                           |      |           |                          |                  | 105                  | 8               |                          | y=536.0x-8.695       | 0.993          | 44              | (1803 <sup>c</sup> ) |                                 |                      |
|                           |      |           |                          |                  | 43                   | 13              |                          | y=339.5x-4.576       | 0.995          | 86              |                      |                                 |                      |
| Ethyl dodecanoate         | IS-6 | 6         | 29.01                    | 88               | 101                  | 5               | 0.001-20.0               | y=0.2478x+0.0023     | 0.995          | 68              | 1862                 | 269                             |                      |
|                           |      |           |                          |                  | 29                   | 8               |                          | y=1.2620x-0.0269     | 0.988          | 42              | (1849 <sup>a</sup> ) |                                 |                      |
|                           |      |           |                          |                  | 43                   | 13              |                          | y=1.4360x-0.0215     | 0.982          | 46              |                      |                                 |                      |
| Geraniol                  | IS-7 | 6         | 29.13                    | 69               | 93                   | 5               | 0.016-331                | y=4.674x-0.2193      | 0.989          | 38              | 1869                 | 230                             |                      |
|                           |      |           |                          |                  | 68                   | 8               |                          | y=4.558x-0.2447      | 0.994          | 21              | (1862 <sup>d</sup> ) |                                 |                      |
|                           |      |           |                          |                  | 41                   | 13              |                          | y=3.365x-0.0663      | 0.996          | 27              |                      |                                 |                      |
| β-phenyl ethanol          | IS-7 | 7         | 30.485                   | 91               | 122                  | 5               | 8.36-167350              | y=318.3x+17.32       | 0.98           | 87              | 1946                 | 219                             |                      |
|                           |      |           |                          |                  | 65                   | 8               |                          | y=286.4x+17.44       | 0.974          | 108             | (1904 <sup>a</sup> ) |                                 |                      |
|                           |      |           |                          |                  |                      | 13              |                          | y=324.9x+16.38       | 0.985          | 69              |                      |                                 |                      |
| Octanoic acid             | IS-7 | 7         | 32.93                    | 60               | 73                   | 5               | 0.65-13016               | y=1.5960x-0.1795     | 0.999          | 90              | 2090                 | 240                             |                      |
|                           |      |           |                          |                  | 55                   | 8               |                          | y=1.4110x+0.0526     | 0.993          | 40              | (2096 <sup>a</sup> ) |                                 |                      |
|                           |      |           |                          |                  | 85                   | 13              |                          | y=1.3080x-2.427      | 0.985          | 45              |                      |                                 |                      |
| Decanoic acid             | IS-7 | 8         | 36.1                     | 60               | 73                   | 5               | 0.1-2301                 | y=4.042x-1.5080      | 0.981          | 25              | 2296                 | 268                             |                      |
|                           |      |           |                          |                  | 57                   | 8               |                          | y=3.352x-1.2580      | 0.993          | 36              | (2370 <sup>a</sup> ) |                                 |                      |
|                           |      |           |                          |                  |                      | 13              |                          | y=1.4950x-0.8231     | 0.985          | 53              |                      |                                 |                      |
| Vanillin                  | IS-7 | 9         | 41.9                     | 151              | 109                  | 5               | 0.03-696                 | y=0.0283x+0.0036     | 0.987          | 6.1             | 2621                 | 285                             |                      |

| Compound                    | IS | SIM group | Retention time (minutes) | Target ion (m/z) | Qualifier ion (m/z)% | Ethanol (% v/v) | Calibration range (µg/L) | Calibration Equation | r <sup>2</sup> | SN ratio at LOQ | RI                   | Boiling Point (°C) <sup>e</sup> |
|-----------------------------|----|-----------|--------------------------|------------------|----------------------|-----------------|--------------------------|----------------------|----------------|-----------------|----------------------|---------------------------------|
|                             |    |           |                          |                  | 81                   | 8               |                          | y=0.0226x+0.0018     | 0.994          | 3.6             | (2555 <sup>c</sup> ) |                                 |
|                             |    |           |                          |                  | 123                  | 13              |                          | y=0.0368x+0.0003     | 0.995          | 4.5             |                      |                                 |
| 4-methyl-2-pentanone (IS-1) |    | 1         | 9.43                     | 43               | 58                   |                 |                          |                      |                |                 |                      |                                 |
|                             |    |           |                          |                  | 85                   |                 |                          |                      |                |                 |                      |                                 |
|                             |    |           |                          |                  | 106                  |                 |                          |                      |                |                 |                      |                                 |
| D5-ethyl butyrate (IS-2)    |    | 1         | 10.23                    | 93               | 71                   |                 |                          |                      |                |                 |                      |                                 |
|                             |    |           |                          |                  | 74                   |                 |                          |                      |                |                 |                      |                                 |
|                             |    |           |                          |                  | 43                   |                 |                          |                      |                |                 |                      |                                 |
| D5-ethyl hexanoate (IS-3)   |    | 2         | 15.15                    | 93               | 99                   |                 |                          |                      |                |                 |                      |                                 |
|                             |    |           |                          |                  | 74                   |                 |                          |                      |                |                 |                      |                                 |
|                             |    |           |                          |                  | 106                  |                 |                          |                      |                |                 |                      |                                 |
| 2-Octanol (IS-4)            |    | 3         | 20.31                    | 45               | 55                   |                 |                          |                      |                |                 |                      |                                 |
|                             |    |           |                          |                  | 97                   |                 |                          |                      |                |                 |                      |                                 |
|                             |    |           |                          |                  | 69                   |                 |                          |                      |                |                 |                      |                                 |
| D5-ethyl octanoate (IS-5)   |    | 3         | 20.82                    | 93               | 106                  |                 |                          |                      |                |                 |                      |                                 |
|                             |    |           |                          |                  | 74                   |                 |                          |                      |                |                 |                      |                                 |
| D5-ethyl decanoate (IS-6)   |    | 5         | 25.15                    | 93               | 106                  |                 |                          |                      |                |                 |                      |                                 |
|                             |    |           |                          |                  | 74                   |                 |                          |                      |                |                 |                      |                                 |
|                             |    |           |                          |                  | 61                   |                 |                          |                      |                |                 |                      |                                 |
| D6-phenol (IS-7)            |    | 7         | 30.35                    | 99               | 71                   |                 |                          |                      |                |                 |                      |                                 |

- 56 <sup>a</sup> Rebière, L.; Clark, A.C.; Schmidtke, L.M.; Prenzler, P.D.; Scollary, G.R. A robust method for quantification of volatile compounds within and between vintages using headspace-  
57 solid-phase micro-extraction coupled with gc-ms - application on semillon wines. *Anal. Chim. Acta* **2010**, *660*, 149-157.
- 58 <sup>b</sup> Escudero, A.; Campo, E.; Fariña, L.; Cacho, J.; Ferreira, V. Analytical characterization of the aroma of five premium red wines. Insights into the role of odor families and the concept  
59 of fruitiness of wines. *J. Agric. Food. Chem.* **2007**, *55*, 4501-4510.
- 60 <sup>c</sup> Barata, A.; Campo, E.; Malfeito-Ferreira, M.; Loureiro, V.; Cacho, J.; Ferreira, V. Analytical and sensorial characterization of the aroma of wines produced with sour rotten grapes  
61 using gc-o and gc-ms: Identification of key aroma compounds. *J. Agric. Food. Chem.* **2011**, *59*, 2543-2553.
- 62 <sup>d</sup> El-Sayed, A.M. The pherobase: Database of insect pheromones and semiochemicals. <http://www.pherobase.com/database/kovats/kovats-index.php> (07/05/2010)
- 63 <sup>e</sup> Clarke, R.J.; Bakker, J. *Wine flavour chemistry*. Blackwell: Oxford, U.K., 2004.

64
